# Supplementary material for: TMED3 promotes the progression and development of lung squamous cell carcinoma by regulating EZR
Source: PubMed Central journal article supplement (PMC8385054; doi:10.1038/s41419-021-04086-9), 2021-08-24
Supplement: 41419_2021_4086_MOESM7_ESM.pdf [file 41419_2021_4086_MOESM7_ESM.pdf]

Please complete the table below to indicate the contributions of all named authors to the figures.

Figure 1:

Ling Zhang, Feng Yu

Figure 2:

An Xie, Feng Yu

Figure 3:

Peng Kuang, Feng Yu

Figure 4:

Xinping Xu, Feng Yu

Figure 5:

An Xie, Xinping Xu, Feng Yu

Figure 6:

Signed for and on behalf of the Author(s):

Feng Yu

Print Name:

Feng Yu

Date:

2021.6.24
